# Supplementary material
Source: Research Square preprint supplement (doi:10.21203/rs.3.rs-9817293/v1)
Supplement: Supplementary file 1 [file eced8fc1fcec881221d348be.docx]

**Supplementary Material**

**Trends and Projections in Chronic Kidney Disease Mortality in the United States, 1999–2050: A CDC WONDER Multiple Cause of Death Analysis**

**List of Supplemental Tables**

**Supplemental Table 1:** Percentage distribution of place of death among CKD-related mortality in the United States, 1999–2025.

**Supplemental Table 2:** Forecast age-adjusted mortality rates for CKD-related mortality, stratified by overall, sex, age group, race and ethnicity, census region, and urbanization, United States, 2026–2050.

**Supplemental Table 3:** Annual age-adjusted mortality rates (AAMRs) and deaths from CKD among U.S. adults aged ≥25 years, overall and stratified by sex, 1999–2025.

**Supplemental Table 4:** Annual AAMRs and deaths from CKD among U.S. adults aged ≥25 years, stratified by age group, 1999–2025.

**Supplemental Table 5:** Annual AAMRs and deaths from CKD among U.S. adults aged ≥25 years, stratified by race and ethnicity, 1999–2025.

**Supplemental Table 6:** Annual AAMRs and deaths from CKD among U.S. adults aged ≥25 years, stratified by urbanization category, 1999–2020.

**Supplemental Table 7:** Annual AAMRs and deaths from CKD among U.S. adults aged ≥25 years, stratified by census region, 1999–2025.

**Supplemental Table 8:** Mean AAMRs and deaths from CKD among U.S. adults aged ≥25 years, stratified by state, 1999–2020 and 2021–2025.

**Supplemental Table 1. Percentage distribution of place of death among CKD-related mortality in the United States, 1999–2025.**

| **Place of Death** | **Deaths** | **% Total** |
| --- | --- | --- |
| Medical Facility – Inpatient | 1,133,873 | 43.95% |
| Medical Facility – Outpatient or Emergency Department | 114,791 | 4.45% |
| Medical Facility – Dead on Arrival | 3,105 | 0.12% |
| Medical Facility – Status Unknown | 460,706 | 17.86% |
| Decedent's Home | 73,846 | 2.86% |
| Hospice Facility | 234,766 | 9.10% |
| Nursing Home or Long-Term Care Facility | 54,221 | 2.10% |
| Other | 2,375 | 0.09% |
| Place of Death Unknown | 4,709 | 0.18% |
| **Total** | **2,578,511** | **100.00%** |

CKD, chronic kidney disease. Deaths with CKD (ICD-10: N18) recorded anywhere on the death certificate from the CDC WONDER Multiple Cause of Death database, January 1999 through December 2025.

**Supplemental Table 2. Forecast age-adjusted mortality rates for CKD-related mortality, stratified by overall, sex, age group, race and ethnicity, census region, and urbanization, United States, 2026–2050 (selected years).**

| **Stratification** | **Year** | **Forecast AAMR (95% Prediction Interval)** |
| --- | --- | --- |
| **Overall** | 2026 | 48.95 (36.92–60.97) |
|  | 2030 | 51.05 (24.16–77.94) |
|  | 2035 | 53.67 (15.64–91.69) |
|  | 2040 | 56.28 (9.70–102.85) |
|  | 2045 | 58.88 (5.10–112.66) |
|  | 2050 | 61.48 (1.35–121.60) |
| **Sex** | | |
| **Women** | 2026 | 39.99 (30.06–49.92) |
|  | 2030 | 41.77 (19.56–63.97) |
|  | 2035 | 43.98 (12.57–75.39) |
|  | 2040 | 46.20 (7.73–84.66) |
|  | 2045 | 48.41 (3.99–92.83) |
|  | 2050 | 50.62 (0.96–100.28) |
| **Men** | 2026 | 60.73 (45.54–75.91) |
|  | 2030 | 62.88 (28.93–96.83) |
|  | 2035 | 65.56 (17.55–113.58) |
|  | 2040 | 68.23 (9.43–127.04) |
|  | 2045 | 70.89 (2.99–138.79) |
|  | 2050 | 73.54 (0–149.46) |
| **Race and Ethnicity** | | |
| **NH American Indian or Alaska Native** | 2026 | 55.07 (35.83–74.30) |
|  | 2030 | 53.53 (10.52–96.54) |
|  | 2035 | 51.61 (0–112.43) |
|  | 2040 | 49.69 (0–124.18) |
|  | 2045 | 47.77 (0–133.78) |
|  | 2050 | 45.85 (0–142.01) |
| **NH Asian or Pacific Islander** | 2026 | 29.17 (17.45–40.89) |
|  | 2030 | 28.18 (1.97–54.39) |
|  | 2035 | 26.95 (0–64.02) |
|  | 2040 | 25.72 (0–71.12) |
|  | 2045 | 24.51 (0–76.93) |
|  | 2050 | 23.30 (0–81.91) |
| **NH Black or African American** | 2026 | 78.55 (54.30–102.79) |
|  | 2030 | 76.87 (22.65–131.09) |
|  | 2035 | 74.78 (0–151.45) |
|  | 2040 | 72.68 (0–166.59) |
|  | 2045 | 70.58 (0–179.02) |
|  | 2050 | 68.49 (0–189.72) |
| **NH White** | 2026 | 46.41 (36.19–56.62) |
|  | 2030 | 49.23 (26.39–72.06) |
|  | 2035 | 52.74 (20.44–85.04) |
|  | 2040 | 56.25 (16.69–95.81) |
|  | 2045 | 59.76 (14.08–105.43) |
|  | 2050 | 63.25 (12.18–114.32) |
| **Hispanic or Latino** | 2026 | 39.12 (24.18–54.05) |
|  | 2030 | 38.03 (4.62–71.43) |
|  | 2035 | 36.66 (0–83.90) |
|  | 2040 | 35.31 (0–93.16) |
|  | 2045 | 33.95 (0–100.75) |
|  | 2050 | 32.59 (0–107.28) |
| **Age Group** | | |
| **25–44 Years** | 2026 | 2.42 (1.61–3.24) |
|  | 2030 | 2.42 (0.59–4.24) |
|  | 2035 | 2.35 (0–4.93) |
|  | 2040 | 2.26 (0–5.43) |
|  | 2045 | 2.16 (0–5.82) |
|  | 2050 | 2.06 (0–6.15) |
| **45–64 Years** | 2026 | 17.68 (12.14–23.23) |
|  | 2030 | 17.66 (5.26–30.06) |
|  | 2035 | 17.44 (0–34.97) |
|  | 2040 | 17.14 (0–38.62) |
|  | 2045 | 16.82 (0–41.62) |
|  | 2050 | 16.49 (0–44.22) |
| **65–85+ Years** | 2026 | 212.61 (160.56–264.66) |
|  | 2030 | 223.16 (106.77–339.55) |
|  | 2035 | 236.26 (71.67–400.86) |
|  | 2040 | 249.28 (47.69–450.88) |
|  | 2045 | 262.24 (29.46–495.02) |
|  | 2050 | 275.14 (14.89–535.40) |
| **Census Region** | | |
| **Northeast** | 2026 | 41.25 (31.95–50.55) |
|  | 2030 | 42.48 (21.68–63.29) |
|  | 2035 | 44.03 (14.61–73.45) |
|  | 2040 | 45.57 (9.54–81.61) |
|  | 2045 | 47.12 (5.51–88.73) |
|  | 2050 | 48.67 (2.15–95.19) |
| **Midwest** | 2026 | 56.13 (43.54–68.71) |
|  | 2030 | 59.46 (31.32–87.61) |
|  | 2035 | 63.63 (23.83–103.43) |
|  | 2040 | 67.80 (19.05–116.55) |
|  | 2045 | 71.97 (15.68–128.26) |
|  | 2050 | 76.13 (13.20–139.07) |
| **South** | 2026 | 50.52 (38.64–62.39) |
|  | 2030 | 52.58 (26.02–79.14) |
|  | 2035 | 55.15 (17.59–92.71) |
|  | 2040 | 57.72 (11.72–103.72) |
|  | 2045 | 60.29 (7.17–113.41) |
|  | 2050 | 62.86 (3.47–122.25) |
| **West** | 2026 | 45.53 (31.03–60.03) |
|  | 2030 | 47.20 (14.78–79.62) |
|  | 2035 | 49.26 (3.41–95.11) |
|  | 2040 | 51.30 (0–107.45) |
|  | 2045 | 53.32 (0–118.16) |
|  | 2050 | 55.33 (0–127.82) |
| **Urbanization** | | |
| **Metropolitan** | 2026 | 47.25 (15.73–78.77) |
|  | 2030 | 49.08 (8.39–89.77) |
|  | 2035 | 51.36 (1.52–101.20) |
|  | 2040 | 53.64 (0–111.18) |
|  | 2045 | 55.91 (0–120.25) |
|  | 2050 | 58.18 (0–128.67) |
| **Non-Metropolitan** | 2026 | 55.92 (24.32–87.51) |
|  | 2030 | 59.30 (18.51–100.10) |
|  | 2035 | 63.54 (13.58–113.50) |
|  | 2040 | 67.77 (10.08–125.46) |
|  | 2045 | 72.01 (7.51–136.51) |
|  | 2050 | 76.24 (5.58–146.90) |

AAMR, age-adjusted mortality rate per 100,000 population, standardized to the 2000 U.S. standard population. Prediction intervals derived by bootstrapping residuals from the 1999–2025 observed series across 1,000 iterations. NH, non-Hispanic. Urbanization forecasts begin in 2021 owing to restricted historical series. Values of 0 in the lower bound of the prediction interval indicate the interval was truncated at zero. CKD, chronic kidney disease (ICD-10: N18). Full annual forecasts for all strata from 2026 to 2050 are available on request.

**Supplemental Table 3. Annual age-adjusted mortality rates (AAMRs) and deaths from CKD among U.S. adults aged ≥25 years, overall and stratified by sex, 1999–2025.**

| **Year** | **Overall** | | **Women** | | **Men** | |
| --- | --- | --- | --- | --- | --- | --- |
|  | **Deaths / Population** | **AAMR (95% CI)** | **Deaths** | **AAMR (95% CI)** | **Deaths** | **AAMR (95% CI)** |
| 1999 | 59481 / 180,408,769 | 33.65 (33.38–33.92) | 28,787 | 27.69 (27.37–28.01) | 30,694 | 43.75 (43.25–44.25) |
| 2000 | 62262 / 181,984,640 | 34.82 (34.54–35.09) | 30,425 | 28.78 (28.45–29.10) | 31,837 | 45.08 (44.57–45.58) |
| 2001 | 65330 / 184,305,128 | 35.92 (35.64–36.19) | 31,862 | 29.69 (29.36–30.02) | 33,468 | 46.37 (45.86–46.88) |
| 2002 | 68089 / 186,208,028 | 36.89 (36.61–37.17) | 32,951 | 30.24 (29.91–30.56) | 35,138 | 47.92 (47.41–48.43) |
| 2003 | 71542 / 188,090,429 | 38.13 (37.85–38.41) | 34,284 | 30.99 (30.66–31.32) | 37,258 | 49.75 (49.24–50.27) |
| 2004 | 72829 / 190,205,384 | 38.22 (37.94–38.50) | 34,870 | 31.09 (30.77–31.42) | 37,959 | 49.73 (49.22–50.24) |
| 2005 | 74940 / 192,551,384 | 38.61 (38.33–38.89) | 35,756 | 31.32 (30.99–31.65) | 39,184 | 50.31 (49.80–50.82) |
| 2006 | 74050 / 195,019,359 | 37.42 (37.15–37.69) | 35,064 | 30.14 (29.82–30.46) | 38,986 | 48.88 (48.39–49.37) |
| 2007 | 73159 / 197,403,777 | 36.24 (35.97–36.50) | 34,701 | 29.27 (28.95–29.58) | 38,458 | 47.12 (46.65–47.60) |
| 2008 | 72055 / 199,795,090 | 34.97 (34.72–35.23) | 33,957 | 28.14 (27.84–28.44) | 38,098 | 45.42 (44.96–45.88) |
| 2009 | 71394 / 202,107,016 | 33.99 (33.74–34.25) | 33,300 | 27.21 (26.92–27.51) | 38,094 | 44.22 (43.77–44.67) |
| 2010 | 71224 / 203,891,983 | 33.34 (33.09–33.59) | 33,130 | 26.63 (26.34–26.92) | 38,094 | 43.40 (42.96–43.85) |
| 2011 | 127988 / 206,592,936 | 58.23 (57.91–58.56) | 61,182 | 47.36 (46.97–47.74) | 66,806 | 74.45 (73.88–75.02) |
| 2012 | 135082 / 208,826,037 | 59.93 (59.60–60.25) | 64,562 | 48.75 (48.36–49.13) | 70,520 | 76.43 (75.86–77.00) |
| 2013 | 83065 / 211,085,314 | 35.96 (35.72–36.21) | 38,862 | 28.70 (28.41–28.99) | 44,203 | 46.89 (46.44–47.33) |
| 2014 | 86026 / 213,809,280 | 36.41 (36.16–36.65) | 40,123 | 29.04 (28.75–29.33) | 45,903 | 47.21 (46.77–47.65) |
| 2015 | 93788 / 216,553,817 | 38.87 (38.62–39.12) | 43,631 | 31.05 (30.75–31.34) | 50,157 | 50.22 (49.77–50.66) |
| 2016 | 100050 / 218,641,417 | 40.60 (40.35–40.85) | 46,601 | 32.52 (32.22–32.82) | 53,449 | 52.15 (51.70–52.60) |
| 2017 | 105853 / 221,447,331 | 41.92 (41.67–42.18) | 49,685 | 33.96 (33.66–34.27) | 56,168 | 53.28 (52.83–53.72) |
| 2018 | 110701 / 223,311,190 | 42.89 (42.63–43.14) | 51,557 | 34.54 (34.24–34.84) | 59,144 | 54.59 (54.15–55.04) |
| 2019 | 115537 / 224,981,167 | 43.90 (43.64–44.15) | 54,070 | 35.64 (35.33–35.94) | 61,467 | 55.30 (54.86–55.75) |
| 2020 | 135864 / 226,635,013 | 50.69 (50.42–50.96) | 62,995 | 40.89 (40.56–41.21) | 72,869 | 64.18 (63.71–64.66) |
| 2021 | 138500 / 224,030,595 | 54.10 (53.81–54.39) | 64,097 | 43.95 (43.60–44.29) | 74,403 | 67.90 (67.40–68.40) |
| 2022 | 129952 / 225,125,435 | 48.31 (48.04–48.57) | 60,847 | 39.39 (39.07–39.71) | 69,105 | 60.88 (60.42–61.35) |
| 2023 | 123348 / 226,995,452 | 45.73 (45.47–45.98) | 58,459 | 38.07 (37.76–38.38) | 64,889 | 56.10 (55.66–56.54) |
| 2024 | 125889 / 230,831,890 | 45.19 (44.94–45.45) | 59,458 | 37.58 (37.27–37.88) | 66,431 | 55.28 (54.85–55.71) |
| 2025 | 130513 / 230,831,890 | 46.84 (46.59–47.10) | 62,105 | 39.25 (38.94–39.57) | 68,408 | 56.97 (56.53–57.40) |
| **Total / Mean** | **2,578,511 / 5,611,669,751** | **41.54 (41.27–41.81)** | **1,217,321** | **33.77 (33.45–34.09)** | **1,361,190** | **53.10 (52.62–53.58)** |

AAMR, age-adjusted mortality rate per 100,000 population, standardized to the 2000 U.S. standard population. CI, confidence interval. CKD, chronic kidney disease (ICD-10: N18). Data source: CDC WONDER Multiple Cause of Death database.

**Supplemental Table 4. Annual age-adjusted mortality rates (AAMRs) and deaths from CKD among U.S. adults aged ≥25 years, stratified by age group, 1999–2025.**

| **Year** | **25–44 Years** | | **45–64 Years** | | **65–85+ Years** | |
| --- | --- | --- | --- | --- | --- | --- |
|  | **Deaths / Population** | **AAMR (95% CI)** | **Deaths / Population** | **AAMR (95% CI)** | **Deaths / Population** | **AAMR (95% CI)** |
| 1999 | 2,422 / 85,255,083 | 2.92 (2.80–3.03) | 11,582 / 60,355,845 | 19.13 (18.78–19.48) | 45,477 / 34,797,841 | 131.67 (130.46–132.88) |
| 2000 | 2,182 / 85,040,251 | 2.61 (2.50–2.72) | 11,404 / 61,952,636 | 18.42 (18.08–18.76) | 48,676 / 34,991,753 | 139.62 (138.38–140.86) |
| 2001 | 2,233 / 84,523,274 | 2.66 (2.55–2.77) | 12,074 / 64,491,563 | 18.76 (18.42–19.09) | 51,023 / 35,290,291 | 144.53 (143.28–145.78) |
| 2002 | 2,318 / 83,990,295 | 2.77 (2.66–2.89) | 12,371 / 66,695,526 | 18.44 (18.11–18.76) | 53,400 / 35,522,207 | 149.81 (148.54–151.09) |
| 2003 | 2,248 / 83,398,001 | 2.72 (2.61–2.83) | 13,190 / 68,828,899 | 18.91 (18.59–19.24) | 56,104 / 35,863,529 | 155.43 (154.15–156.72) |
| 2004 | 2,147 / 83,066,831 | 2.62 (2.51–2.73) | 13,423 / 70,935,234 | 18.52 (18.20–18.83) | 57,259 / 36,203,319 | 156.83 (155.55–158.12) |
| 2005 | 2,150 / 82,764,185 | 2.66 (2.55–2.78) | 13,501 / 73,137,401 | 17.92 (17.62–18.22) | 59,289 / 36,649,798 | 159.78 (158.50–161.07) |
| 2006 | 2,023 / 82,638,980 | 2.51 (2.40–2.62) | 13,587 / 75,216,272 | 17.51 (17.22–17.81) | 58,440 / 37,164,107 | 154.78 (153.52–156.03) |
| 2007 | 1,923 / 82,509,693 | 2.40 (2.29–2.51) | 13,267 / 77,068,373 | 16.56 (16.27–16.84) | 57,969 / 37,825,711 | 150.65 (149.42–151.88) |
| 2008 | 1,865 / 82,399,959 | 2.35 (2.25–2.46) | 13,131 / 78,617,510 | 16.00 (15.72–16.27) | 57,059 / 38,777,621 | 145.27 (144.08–146.47) |
| 2009 | 1,948 / 82,211,153 | 2.46 (2.35–2.57) | 13,504 / 80,272,688 | 16.06 (15.79–16.33) | 55,942 / 39,623,175 | 139.90 (138.74–141.06) |
| 2010 | 1,722 / 82,134,554 | 2.20 (2.10–2.30) | 13,414 / 81,489,445 | 15.56 (15.30–15.83) | 56,088 / 40,267,984 | 138.05 (136.90–139.20) |
| 2011 | 2,644 / 82,418,452 | 3.35 (3.22–3.47) | 21,077 / 82,780,343 | 23.80 (23.48–24.13) | 104,267 / 41,394,141 | 248.24 (246.72–249.75) |
| 2012 | 2,613 / 82,825,741 | 3.30 (3.17–3.43) | 21,495 / 82,854,940 | 24.08 (23.75–24.40) | 110,974 / 43,145,356 | 256.53 (255.01–258.05) |
| 2013 | 1,460 / 83,297,277 | 1.83 (1.73–1.92) | 12,283 / 83,083,963 | 13.60 (13.35–13.84) | 69,322 / 44,704,074 | 155.81 (154.64–156.98) |
| 2014 | 1,471 / 84,029,637 | 1.84 (1.74–1.93) | 12,613 / 83,536,432 | 13.81 (13.57–14.06) | 71,942 / 46,243,211 | 157.67 (156.51–158.83) |
| 2015 | 1,622 / 84,726,985 | 2.09 (1.99–2.19) | 13,707 / 84,065,980 | 14.89 (14.64–15.14) | 78,459 / 47,760,852 | 167.78 (166.60–168.97) |
| 2016 | 1,715 / 85,147,399 | 2.15 (2.04–2.25) | 14,692 / 84,249,823 | 15.82 (15.56–16.08) | 83,643 / 49,244,195 | 174.87 (173.67–176.07) |
| 2017 | 1,770 / 86,218,042 | 2.20 (2.10–2.30) | 15,282 / 84,370,610 | 16.32 (16.05–16.58) | 88,801 / 50,858,679 | 180.63 (179.43–181.83) |
| 2018 | 1,924 / 86,975,662 | 2.35 (2.25–2.46) | 15,795 / 83,904,335 | 16.92 (16.65–17.19) | 92,982 / 52,431,193 | 184.15 (182.96–185.35) |
| 2019 | 1,928 / 87,599,465 | 2.41 (2.30–2.52) | 16,054 / 83,323,439 | 17.26 (16.98–17.53) | 97,555 / 54,058,263 | 188.60 (187.41–189.79) |
| 2020 | 2,395 / 88,205,838 | 2.88 (2.77–3.00) | 19,158 / 82,769,810 | 20.65 (20.35–20.95) | 114,311 / 55,659,365 | 216.28 (215.02–217.54) |
| 2021 | 2,733 / 86,512,094 | 3.35 (3.23–3.48) | 20,064 / 82,231,945 | 21.95 (21.64–22.27) | 115,703 / 55,286,556 | 230.31 (228.98–231.66) |
| 2022 | 2,436 / 86,714,130 | 2.93 (2.81–3.05) | 17,848 / 81,224,314 | 19.81 (19.51–20.11) | 109,668 / 57,186,991 | 205.46 (204.24–206.68) |
| 2023 | 2,188 / 87,355,841 | 2.61 (2.50–2.72) | 16,207 / 81,027,312 | 17.95 (17.67–18.24) | 104,953 / 58,612,299 | 196.25 (195.06–197.45) |
| 2024 | 2,107 / 89,258,716 | 2.51 (2.40–2.62) | 15,821 / 81,072,359 | 17.56 (17.28–17.84) | 107,961 / 60,500,815 | 194.46 (193.30–195.63) |
| 2025 | 2,045 / 89,258,716 | 2.41 (2.31–2.52) | 15,914 / 81,072,359 | 17.66 (17.38–17.94) | 112,554 / 60,500,815 | 202.97 (201.78–204.16) |
| **Total / Mean** | **56,232 / 2,290,476,254** | **2.55 (2.44–2.66)** | **402,458 / 2,100,629,356** | **17.92 (17.62–18.21)** | **2,119,821 / 1,220,564,141** | **175.04 (173.80–176.29)** |

AAMR, age-adjusted mortality rate per 100,000 population, standardized to the 2000 U.S. standard population. CI, confidence interval. CKD, chronic kidney disease (ICD-10: N18). Data source: CDC WONDER Multiple Cause of Death database.

**Supplemental Table 5. Annual age-adjusted mortality rates (AAMRs) and deaths from CKD among U.S. adults aged ≥25 years, stratified by race and ethnicity, 1999–2025.**

| **Year** | **NH American Indian or Alaska Native** | | **NH Asian or Pacific Islander** | | **NH Black or African American** | | **NH White** | | **Hispanic or Latino** | |
| --- | --- | --- | --- | --- | --- | --- | --- | --- | --- | --- |
|  | **Deaths / Pop.** | **AAMR (95% CI)** | **Deaths / Pop.** | **AAMR (95% CI)** | **Deaths / Pop.** | **AAMR (95% CI)** | **Deaths / Pop.** | **AAMR (95% CI)** | **Deaths / Pop.** | **AAMR (95% CI)** |
| 1999 | 494 / 1,243,850 | 63.04 (57.14–68.93) | 1,452 / 6,917,321 | 36.85 (34.86–38.84) | 13,880 / 19,808,077 | 89.95 (88.44–91.47) | 39,553 / 134,935,890 | 26.67 (26.41–26.94) | 4,102 / 17,503,631 | 44.80 (43.36–46.24) |
| 2000 | 531 / 1,293,461 | 62.37 (56.77–67.98) | 1,445 / 7,210,256 | 34.44 (32.58–36.30) | 13,783 / 20,058,273 | 88.86 (87.36–90.37) | 42,289 / 135,202,971 | 28.20 (27.94–28.47) | 4,214 / 18,219,679 | 44.48 (43.07–45.89) |
| 2001 | 532 / 1,307,212 | 62.18 (56.59–67.78) | 1,601 / 7,651,274 | 35.42 (33.61–37.22) | 14,334 / 20,404,945 | 90.19 (88.69–91.69) | 44,331 / 135,651,679 | 29.23 (28.96–29.50) | 4,532 / 19,290,018 | 45.07 (43.70–46.44) |
| 2002 | 593 / 1,325,864 | 64.87 (59.32–70.43) | 1,715 / 7,999,855 | 35.86 (34.09–37.62) | 14,732 / 20,695,836 | 91.58 (90.08–93.09) | 46,183 / 136,026,843 | 30.10 (29.83–30.38) | 4,866 / 20,159,630 | 46.13 (44.77–47.49) |
| 2003 | 641 / 1,343,849 | 68.69 (63.01–74.38) | 1,810 / 8,336,941 | 35.41 (33.72–37.10) | 15,162 / 20,982,115 | 92.11 (90.62–93.61) | 48,666 / 136,415,868 | 31.28 (31.00–31.56) | 5,263 / 21,011,656 | 47.30 (45.96–48.64) |
| 2004 | 597 / 1,364,416 | 63.88 (58.40–69.37) | 1,820 / 8,679,634 | 34.23 (32.60–35.85) | 15,357 / 21,327,519 | 91.66 (90.17–93.14) | 49,695 / 136,956,601 | 31.64 (31.36–31.91) | 5,360 / 21,877,214 | 46.15 (44.86–47.45) |
| 2005 | 624 / 1,387,305 | 65.15 (59.69–70.62) | 1,932 / 9,041,913 | 34.18 (32.60–35.75) | 15,424 / 21,703,691 | 90.10 (88.64–91.55) | 51,161 / 137,614,452 | 32.09 (31.81–32.37) | 5,799 / 22,804,023 | 47.33 (46.05–48.60) |
| 2006 | 598 / 1,410,814 | 58.70 (53.64–63.76) | 1,986 / 9,409,587 | 33.01 (31.51–34.50) | 15,007 / 22,092,072 | 85.34 (83.94–86.74) | 50,778 / 138,363,022 | 31.36 (31.09–31.63) | 5,681 / 23,743,864 | 44.36 (43.16–45.57) |
| 2007 | 646 / 1,434,577 | 63.24 (58.02–68.45) | 2,056 / 9,760,888 | 32.41 (30.96–33.85) | 14,521 / 22,474,128 | 80.64 (79.29–81.99) | 50,250 / 139,060,265 | 30.49 (30.22–30.75) | 5,686 / 24,673,919 | 42.23 (41.08–43.38) |
| 2008 | 612 / 1,460,440 | 57.90 (52.99–62.81) | 2,051 / 10,102,040 | 30.51 (29.15–31.87) | 13,967 / 22,857,307 | 75.52 (74.24–76.81) | 49,620 / 139,772,453 | 29.67 (29.40–29.93) | 5,805 / 25,602,850 | 40.56 (39.47–41.65) |
| 2009 | 623 / 1,485,009 | 54.81 (50.19–59.42) | 2,032 / 10,429,408 | 28.79 (27.50–30.07) | 14,121 / 23,236,715 | 74.14 (72.88–75.39) | 48,590 / 140,451,863 | 28.64 (28.38–28.90) | 6,028 / 26,504,021 | 39.73 (38.68–40.78) |
| 2010 | 655 / 1,503,624 | 56.90 (52.24–61.57) | 2,118 / 10,670,562 | 28.70 (27.45–29.96) | 13,848 / 23,537,629 | 71.42 (70.20–72.65) | 48,513 / 140,987,505 | 28.24 (27.99–28.50) | 6,090 / 27,192,663 | 38.98 (37.95–40.00) |
| 2011 | 986 / 1,533,376 | 85.34 (79.68–91.00) | 3,974 / 11,055,808 | 50.90 (49.28–52.51) | 23,689 / 23,958,352 | 119.34 (117.78–120.90) | 88,718 / 141,789,725 | 50.19 (49.86–50.52) | 10,621 / 28,255,675 | 64.60 (63.33–65.88) |
| 2012 | 1,089 / 1,556,684 | 88.76 (83.17–94.34) | 4,314 / 11,510,641 | 51.34 (49.78–52.91) | 24,466 / 24,345,607 | 119.41 (117.88–120.95) | 93,714 / 142,424,668 | 51.94 (51.60–52.28) | 11,499 / 28,988,437 | 66.64 (65.37–67.90) |
| 2013 | 612 / 1,581,241 | 48.93 (44.85–53.02) | 2,366 / 11,931,284 | 26.27 (25.19–27.34) | 14,621 / 24,743,381 | 69.44 (68.29–70.60) | 59,372 / 143,045,234 | 32.27 (32.01–32.54) | 6,094 / 29,784,174 | 33.57 (32.70–34.44) |
| 2014 | 586 / 1,608,821 | 44.76 (40.95–48.57) | 2,565 / 12,503,895 | 26.56 (25.51–27.60) | 14,808 / 25,244,585 | 67.75 (66.63–68.87) | 61,745 / 143,642,265 | 33.06 (32.79–33.32) | 6,322 / 30,809,714 | 32.85 (32.01–33.68) |
| 2015 | 669 / 1,637,629 | 48.06 (44.25–51.88) | 2,680 / 13,054,155 | 25.93 (24.93–26.93) | 16,167 / 25,752,287 | 71.84 (70.70–72.98) | 67,089 / 144,347,874 | 35.44 (35.17–35.72) | 7,183 / 31,761,872 | 35.28 (34.44–36.13) |
| 2016 | 800 / 1,667,114 | 56.14 (52.09–60.19) | 2,954 / 13,344,756 | 27.12 (26.13–28.11) | 17,216 / 26,212,105 | 74.22 (73.08–75.36) | 71,249 / 144,979,180 | 37.07 (36.79–37.34) | 7,831 / 32,438,262 | 36.56 (35.72–37.39) |
| 2017 | 804 / 1,695,440 | 54.73 (50.80–58.65) | 3,422 / 13,938,546 | 29.47 (28.47–30.47) | 18,375 / 26,762,620 | 76.26 (75.13–77.40) | 74,820 / 145,456,222 | 38.29 (38.01–38.57) | 8,432 / 33,594,503 | 37.31 (36.49–38.14) |
| 2018 | 822 / 1,722,458 | 52.26 (48.56–55.96) | 3,437 / 14,258,765 | 27.99 (27.04–28.94) | 18,849 / 27,178,229 | 76.49 (75.37–77.62) | 78,477 / 145,801,376 | 39.41 (39.13–39.69) | 9,116 / 34,350,362 | 38.57 (37.75–39.38) |
| 2019 | 918 / 1,746,677 | 57.15 (53.33–60.96) | 3,690 / 14,536,839 | 28.63 (27.70–29.57) | 19,592 / 27,592,123 | 77.29 (76.18–78.40) | 81,610 / 146,079,678 | 40.38 (40.10–40.66) | 9,727 / 35,025,850 | 39.75 (38.94–40.57) |
| 2020 | 1,148 / 1,771,292 | 68.48 (64.40–72.55) | 4,500 / 14,798,344 | 33.22 (32.23–34.20) | 23,931 / 27,969,928 | 91.90 (90.71–93.10) | 94,031 / 146,337,256 | 46.08 (45.78–46.38) | 12,254 / 35,758,193 | 47.43 (46.56–48.29) |
| 2021 | 1,132 / 1,604,632 | 72.11 (67.84–76.59) | 4,542 / 14,425,606 | 34.40 (33.40–35.43) | 23,810 / 27,538,737 | 93.16 (91.95–94.39) | 96,533 / 144,655,323 | 50.10 (49.78–50.42) | 12,483 / 35,806,297 | 48.24 (47.36–49.12) |
| 2022 | 974 / 1,599,267 | 59.55 (55.79–63.52) | 4,652 / 14,877,327 | 32.72 (31.78–33.68) | 22,077 / 27,685,911 | 84.23 (83.10–85.38) | 90,869 / 144,499,701 | 44.69 (44.39–44.98) | 11,380 / 36,463,229 | 42.30 (41.50–43.11) |
| 2023 | 880 / 1,625,106 | 51.41 (48.00–55.02) | 4,430 / 15,269,889 | 30.08 (29.20–30.99) | 20,935 / 28,042,483 | 78.59 (77.50–79.69) | 86,500 / 144,415,042 | 42.84 (42.55–43.13) | 10,603 / 37,642,932 | 38.24 (37.50–39.00) |
| 2024 | 909 / 1,646,944 | 50.86 (47.55–54.37) | 4,505 / 16,286,959 | 28.35 (27.53–29.20) | 21,392 / 28,588,970 | 77.27 (76.22–78.34) | 88,169 / 144,849,472 | 42.57 (42.29–42.86) | 10,914 / 39,459,545 | 36.81 (36.10–37.52) |
| 2025 | 909 / 1,646,944 | 50.57 (47.28–54.05) | 4,671 / 16,286,959 | 29.58 (28.74–30.45) | 22,212 / 28,588,970 | 80.45 (79.37–81.54) | 91,317 / 144,849,472 | 44.10 (43.81–44.39) | 11,404 / 39,459,545 | 38.63 (37.91–39.37) |
| **Total / Mean** | **20,384 / 41,204,046** | **60.40 (55.79–65.04)** | **78,720 / 314,289,452** | **32.68 (31.39–33.97)** | **476,276 / 659,382,595** | **84.41 (83.12–85.70)** | **1,793,842 / 3,818,611,900** | **36.52 (36.23–36.80)** | **209,289 / 778,181,758** | **43.10 (42.06–44.15)** |

AAMR, age-adjusted mortality rate per 100,000 population, standardized to the 2000 U.S. standard population. CI, confidence interval. NH, non-Hispanic. CKD, chronic kidney disease (ICD-10: N18). Data source: CDC WONDER Multiple Cause of Death database.

**Supplemental Table 6. Annual age-adjusted mortality rates (AAMRs) and deaths from CKD among U.S. adults aged ≥25 years, stratified by urbanization category, 1999–2020.**

| **Year** | **Metropolitan** | | **Non-Metropolitan** | |
| --- | --- | --- | --- | --- |
|  | **Deaths** | **AAMR (95% CI)** | **Deaths** | **AAMR (95% CI)** |
| 1999 | 48,910 | 34.07 (33.77–34.37) | 10,571 | 31.80 (31.19–32.41) |
| 2000 | 50,795 | 34.97 (34.67–35.27) | 11,467 | 34.13 (33.50–34.75) |
| 2001 | 53,400 | 36.09 (35.79–36.40) | 11,930 | 35.23 (34.60–35.87) |
| 2002 | 55,750 | 37.05 (36.75–37.36) | 12,339 | 36.08 (35.44–36.72) |
| 2003 | 58,323 | 38.07 (37.76–38.38) | 13,219 | 38.24 (37.59–38.90) |
| 2004 | 59,492 | 38.24 (37.93–38.55) | 13,337 | 38.17 (37.52–38.82) |
| 2005 | 61,164 | 38.53 (38.22–38.83) | 13,776 | 39.00 (38.34–39.65) |
| 2006 | 60,605 | 37.40 (37.10–37.70) | 13,445 | 37.47 (36.83–38.10) |
| 2007 | 59,594 | 36.02 (35.73–36.32) | 13,565 | 37.23 (36.60–37.86) |
| 2008 | 58,338 | 34.46 (34.18–34.74) | 13,717 | 37.22 (36.59–37.84) |
| 2009 | 57,802 | 33.47 (33.20–33.75) | 13,592 | 36.42 (35.80–37.03) |
| 2010 | 57,687 | 32.78 (32.51–33.05) | 13,537 | 35.88 (35.27–36.49) |
| 2011 | 104,800 | 57.84 (57.49–58.19) | 23,188 | 60.29 (59.51–61.08) |
| 2012 | 110,681 | 59.44 (59.08–59.79) | 24,401 | 62.34 (61.55–63.14) |
| 2013 | 67,965 | 35.60 (35.32–35.87) | 15,100 | 37.92 (37.31–38.53) |
| 2014 | 70,392 | 35.97 (35.70–36.24) | 15,634 | 38.73 (38.11–39.34) |
| 2015 | 76,642 | 38.21 (37.93–38.48) | 17,146 | 42.01 (41.37–42.65) |
| 2016 | 81,882 | 39.94 (39.66–40.22) | 18,168 | 44.04 (43.39–44.69) |
| 2017 | 86,422 | 41.08 (40.81–41.36) | 19,431 | 46.23 (45.57–46.89) |
| 2018 | 90,447 | 42.05 (41.77–42.32) | 20,254 | 47.26 (46.60–47.92) |
| 2019 | 94,209 | 42.85 (42.58–43.13) | 21,328 | 49.18 (48.50–49.85) |
| 2020 | 110,621 | 49.39 (49.10–49.69) | 25,243 | 57.74 (57.01–58.47) |
| **Total / Mean** | **1,575,921** | **39.70 (39.41–40.00)** | **354,388** | **41.93 (41.28–42.59)** |

AAMR, age-adjusted mortality rate per 100,000 population, standardized to the 2000 U.S. standard population. CI, confidence interval. Urbanization classified using the 2013 NCHS Urban–Rural Classification Scheme for Counties. Data available through 2020 only for this stratum. CKD, chronic kidney disease (ICD-10: N18). Data source: CDC WONDER Multiple Cause of Death database.

**Supplemental Table 7. Annual age-adjusted mortality rates (AAMRs) and deaths from CKD among U.S. adults aged ≥25 years, stratified by census region, 1999–2025.**

| **Year** | **Northeast** | | **Midwest** | | **South** | | **West** | |
| --- | --- | --- | --- | --- | --- | --- | --- | --- |
|  | **Deaths** | **AAMR (95% CI)** | **Deaths** | **AAMR (95% CI)** | **Deaths** | **AAMR (95% CI)** | **Deaths** | **AAMR (95% CI)** |
| 1999 | 12,324 | 33.11 (32.52–33.69) | 14,026 | 33.29 (32.74–33.84) | 22,036 | 35.35 (34.88–35.82) | 11,095 | 31.47 (30.88–32.05) |
| 2000 | 12,868 | 34.19 (33.60–34.78) | 14,703 | 34.63 (34.07–35.19) | 23,407 | 37.12 (36.65–37.60) | 11,284 | 31.53 (30.95–32.12) |
| 2001 | 13,213 | 34.68 (34.09–35.27) | 15,364 | 35.78 (35.21–36.34) | 24,617 | 38.37 (37.89–38.85) | 12,136 | 33.03 (32.44–33.62) |
| 2002 | 13,534 | 35.11 (34.52–35.70) | 16,197 | 37.25 (36.67–37.82) | 25,361 | 38.89 (38.41–39.37) | 12,997 | 34.62 (34.03–35.22) |
| 2003 | 13,721 | 35.15 (34.56–35.74) | 16,927 | 38.36 (37.78–38.94) | 26,824 | 40.44 (39.95–40.92) | 14,070 | 36.63 (36.02–37.23) |
| 2004 | 13,924 | 35.34 (34.75–35.93) | 17,395 | 39.02 (38.44–39.60) | 26,955 | 39.87 (39.39–40.35) | 14,555 | 37.16 (36.55–37.76) |
| 2005 | 13,992 | 35.10 (34.51–35.68) | 17,701 | 39.15 (38.58–39.73) | 28,152 | 40.75 (40.28–41.23) | 15,095 | 37.49 (36.89–38.09) |
| 2006 | 13,630 | 33.72 (33.16–34.29) | 17,649 | 38.42 (37.85–38.99) | 27,838 | 39.36 (38.89–39.82) | 14,933 | 36.20 (35.62–36.78) |
| 2007 | 13,487 | 32.92 (32.36–33.48) | 17,333 | 37.09 (36.54–37.65) | 27,512 | 38.08 (37.63–38.53) | 14,827 | 35.05 (34.49–35.62) |
| 2008 | 13,027 | 31.35 (30.81–31.89) | 17,171 | 36.22 (35.67–36.76) | 27,104 | 36.58 (36.14–37.02) | 14,753 | 33.96 (33.41–34.52) |
| 2009 | 12,784 | 30.45 (29.92–30.98) | 16,860 | 35.11 (34.58–35.64) | 27,260 | 35.94 (35.51–36.37) | 14,490 | 32.42 (31.89–32.95) |
| 2010 | 12,857 | 30.22 (29.69–30.75) | 16,777 | 34.46 (33.93–34.99) | 27,175 | 35.21 (34.79–35.63) | 14,415 | 31.55 (31.03–32.07) |
| 2011 | 21,608 | 49.57 (48.90–50.24) | 30,736 | 61.57 (60.88–62.27) | 47,075 | 59.34 (58.80–59.88) | 28,569 | 60.49 (59.79–61.20) |
| 2012 | 22,607 | 50.78 (50.11–51.45) | 32,040 | 62.92 (62.23–63.62) | 49,703 | 60.86 (60.32–61.40) | 30,732 | 63.16 (62.44–63.87) |
| 2013 | 14,817 | 32.58 (32.05–33.11) | 19,932 | 38.39 (37.85–38.93) | 31,517 | 37.56 (37.15–37.98) | 16,799 | 33.56 (33.05–34.07) |
| 2014 | 14,872 | 32.22 (31.70–32.75) | 21,057 | 39.96 (39.41–40.51) | 32,513 | 37.68 (37.27–38.10) | 17,584 | 34.08 (33.57–34.59) |
| 2015 | 16,136 | 34.52 (33.98–35.06) | 22,951 | 42.92 (42.36–43.49) | 35,461 | 40.03 (39.61–40.45) | 19,240 | 36.17 (35.65–36.69) |
| 2016 | 16,894 | 35.87 (35.32–36.43) | 23,892 | 44.14 (43.57–44.71) | 38,397 | 42.21 (41.78–42.64) | 20,867 | 38.21 (37.68–38.73) |
| 2017 | 17,430 | 35.80 (35.26–36.34) | 25,396 | 45.97 (45.40–46.55) | 41,061 | 44.00 (43.57–44.43) | 21,966 | 39.38 (38.85–39.91) |
| 2018 | 18,361 | 37.37 (36.82–37.92) | 26,756 | 47.68 (47.10–48.25) | 43,319 | 45.14 (44.71–45.56) | 22,265 | 38.80 (38.28–39.31) |
| 2019 | 19,130 | 38.33 (37.78–38.88) | 27,964 | 49.11 (48.52–49.69) | 44,606 | 45.40 (44.98–45.83) | 23,837 | 40.59 (40.07–41.11) |
| 2020 | 22,289 | 44.29 (43.70–44.88) | 33,361 | 57.98 (57.35–58.61) | 52,349 | 52.04 (51.59–52.49) | 27,865 | 46.49 (45.94–47.04) |
| 2021 | 21,707 | 44.62 (44.02–45.23) | 32,736 | 59.93 (59.27–60.59) | 55,210 | 57.18 (56.70–57.67) | 28,847 | 50.99 (50.39–51.58) |
| 2022 | 21,000 | 41.28 (40.72–41.85) | 30,593 | 53.47 (52.87–54.08) | 50,671 | 49.88 (49.44–50.32) | 27,688 | 46.27 (45.72–46.82) |
| 2023 | 19,919 | 39.29 (38.74–39.85) | 29,295 | 51.44 (50.85–52.04) | 48,135 | 47.02 (46.59–47.45) | 25,999 | 43.17 (42.64–43.70) |
| 2024 | 20,350 | 38.97 (38.43–39.51) | 30,473 | 52.02 (51.43–52.61) | 48,879 | 46.16 (45.74–46.57) | 26,187 | 41.99 (41.48–42.51) |
| 2025 | 21,151 | 40.53 (39.98–41.09) | 31,550 | 53.82 (53.22–54.43) | 51,433 | 48.56 (48.13–48.98) | 26,379 | 42.33 (41.82–42.85) |
| **Total / Mean** | **447,632** | **36.93 (36.37–37.51)** | **616,835** | **44.44 (43.86–45.03)** | **984,570** | **43.29 (42.84–43.75)** | **529,474** | **39.51 (38.94–40.07)** |

AAMR, age-adjusted mortality rate per 100,000 population, standardized to the 2000 U.S. standard population. CI, confidence interval. Census regions follow U.S. Census Bureau standard classifications. CKD, chronic kidney disease (ICD-10: N18). Data source: CDC WONDER Multiple Cause of Death database.

**Supplemental Table 8. Mean age-adjusted mortality rates (AAMRs) and deaths from CKD among U.S. adults aged ≥25 years, stratified by state, 1999–2020 and 2021–2025.**

| **State** | **1999–2020** | | **2021–2025** | | **Weighted Mean AAMR 1999–2025** |
| --- | --- | --- | --- | --- | --- |
|  | **Deaths / Population** | **AAMR (95% CI)** | **Deaths / Population** | **AAMR (95% CI)** |  |
| Alabama | 31,254 / 68,915,349 | 41.98 (41.51–42.45) | 9,246 / 17,287,990 | 44.17 (43.25–45.10) | 42.39 |
| Alaska | 2,131 / 9,623,822 | 35.45 (33.86–37.04) | 924 / 2,338,393 | 44.98 (42.00–48.13) | 37.21 |
| Arizona | 27,750 / 90,089,006 | 27.90 (27.57–28.23) | 10,797 / 25,171,026 | 33.60 (32.96–34.25) | 28.96 |
| Arkansas | 17,397 / 41,711,420 | 37.01 (36.45–37.56) | 7,205 / 10,212,699 | 57.85 (56.50–59.22) | 40.87 |
| California | 228,273 / 530,625,638 | 44.16 (43.98–44.35) | 68,004 / 131,414,078 | 45.96 (45.62–46.31) | 44.49 |
| Colorado | 22,671 / 73,189,174 | 35.07 (34.61–35.54) | 11,282 / 20,145,538 | 56.34 (55.29–57.40) | 39.01 |
| Connecticut | 20,979 / 53,012,824 | 33.41 (32.95–33.87) | 6,400 / 12,618,447 | 38.96 (38.00–39.94) | 34.44 |
| Delaware | 5,975 / 13,210,778 | 40.72 (39.68–41.76) | 1,794 / 3,600,670 | 38.22 (36.43–40.09) | 40.26 |
| District of Columbia | 4,510 / 9,448,827 | 52.73 (51.18–54.28) | 1,223 / 2,386,464 | 56.10 (52.98–59.37) | 53.35 |
| Florida | 112,223 / 289,701,852 | 30.11 (29.93–30.29) | 42,131 / 80,920,105 | 36.73 (36.37–37.09) | 31.34 |
| Georgia | 50,129 / 135,415,629 | 41.19 (40.82–41.55) | 18,339 / 36,617,008 | 47.79 (47.09–48.50) | 42.41 |
| Hawaii | 8,451 / 20,066,183 | 36.26 (35.48–37.05) | 2,253 / 4,183,409 | 34.43 (32.97–35.95) | 35.92 |
| Idaho | 7,448 / 21,392,071 | 33.47 (32.70–34.23) | 3,133 / 6,383,908 | 43.31 (41.78–44.88) | 35.29 |
| Illinois | 77,813 / 184,489,320 | 40.06 (39.77–40.34) | 25,145 / 43,190,910 | 48.85 (48.24–49.46) | 41.69 |
| Indiana | 49,960 / 92,386,904 | 50.41 (49.96–50.85) | 17,810 / 22,783,490 | 66.67 (65.68–67.67) | 53.42 |
| Iowa | 20,018 / 44,030,204 | 35.48 (34.99–35.98) | 7,674 / 10,690,393 | 54.24 (53.02–55.49) | 38.95 |
| Kansas | 16,356 / 39,931,570 | 35.25 (34.70–35.79) | 5,784 / 9,577,350 | 48.41 (47.16–49.70) | 37.69 |
| Kentucky | 30,502 / 63,061,451 | 46.48 (45.95–47.00) | 12,138 / 15,364,957 | 67.93 (66.71–69.17) | 50.45 |
| Louisiana | 29,798 / 64,895,449 | 45.15 (44.64–45.67) | 8,781 / 15,350,983 | 49.43 (48.38–50.49) | 45.94 |
| Maine | 9,280 / 20,521,512 | 37.48 (36.72–38.25) | 3,110 / 5,100,731 | 44.65 (43.07–46.29) | 38.81 |
| Maryland | 40,431 / 84,902,583 | 47.62 (47.16–48.09) | 13,713 / 21,139,685 | 55.24 (54.31–56.19) | 49.03 |
| Massachusetts | 40,416 / 99,096,796 | 35.82 (35.47–36.17) | 13,791 / 24,549,650 | 45.70 (44.94–46.48) | 37.65 |
| Michigan | 66,441 / 145,550,610 | 41.36 (41.04–41.67) | 21,385 / 34,542,522 | 50.38 (49.70–51.08) | 43.03 |
| Minnesota | 35,838 / 77,002,440 | 42.05 (41.61–42.49) | 13,264 / 19,377,608 | 55.81 (54.85–56.77) | 44.60 |
| Mississippi | 20,066 / 41,496,865 | 45.86 (45.22–46.49) | 6,412 / 9,803,883 | 55.56 (54.18–56.96) | 47.66 |
| Missouri | 39,714 / 86,518,061 | 40.61 (40.21–41.01) | 13,835 / 20,983,924 | 53.37 (52.48–54.28) | 42.97 |
| Montana | 4,626 / 14,577,633 | 27.18 (26.39–27.97) | 2,135 / 3,870,200 | 43.94 (42.07–45.89) | 30.28 |
| Nebraska | 12,195 / 25,869,503 | 39.91 (39.19–40.62) | 4,223 / 6,431,364 | 53.90 (52.27–55.58) | 42.50 |
| Nevada | 10,360 / 38,580,189 | 29.02 (28.45–29.60) | 4,144 / 10,925,528 | 34.68 (33.61–35.77) | 30.07 |
| New Hampshire | 7,566 / 19,856,602 | 35.58 (34.78–36.39) | 2,936 / 5,078,126 | 45.82 (44.15–47.54) | 37.48 |
| New Jersey | 51,896 / 130,947,870 | 36.25 (35.94–36.56) | 15,554 / 32,214,603 | 39.67 (39.05–40.31) | 36.88 |
| New Mexico | 10,341 / 28,568,524 | 33.72 (33.06–34.37) | 3,518 / 7,165,546 | 39.50 (38.18–40.86) | 34.79 |
| New York | 101,725 / 288,624,005 | 32.10 (31.90–32.30) | 26,160 / 68,545,171 | 30.17 (29.80–30.54) | 31.74 |
| North Carolina | 71,850 / 137,233,223 | 50.91 (50.54–51.29) | 25,373 / 36,798,893 | 59.74 (59.00–60.49) | 52.55 |
| North Dakota | 6,024 / 9,822,062 | 47.96 (46.73–49.20) | 1,928 / 2,528,896 | 59.61 (56.94–62.40) | 50.12 |
| Ohio | 92,013 / 169,651,360 | 47.99 (47.68–48.30) | 26,407 / 40,296,853 | 52.93 (52.29–53.59) | 48.90 |
| Oklahoma | 25,362 / 53,110,132 | 43.93 (43.39–44.47) | 8,981 / 12,828,467 | 60.04 (58.79–61.31) | 46.91 |
| Oregon | 23,127 / 57,214,641 | 36.35 (35.87–36.82) | 10,056 / 14,807,088 | 56.55 (55.44–57.68) | 40.09 |
| Pennsylvania | 100,372 / 189,975,429 | 42.33 (42.07–42.60) | 33,211 / 45,365,479 | 54.94 (54.35–55.55) | 44.67 |
| Rhode Island | 7,759 / 15,765,032 | 40.00 (39.10–40.90) | 1,813 / 3,852,861 | 36.50 (34.82–38.26) | 39.35 |
| South Carolina | 36,300 / 67,227,226 | 51.11 (50.58–51.64) | 10,644 / 18,445,053 | 47.66 (46.73–48.60) | 50.47 |
| South Dakota | 5,687 / 11,603,220 | 38.82 (37.80–39.85) | 2,209 / 2,996,331 | 59.36 (56.87–61.96) | 42.62 |
| Tennessee | 43,882 / 92,689,763 | 45.58 (45.15–46.01) | 14,344 / 24,275,086 | 51.95 (51.09–52.82) | 46.76 |
| Texas | 144,785 / 344,632,461 | 46.73 (46.49–46.98) | 50,138 / 98,287,893 | 52.22 (51.76–52.68) | 47.75 |
| Utah | 8,770 / 34,057,911 | 30.29 (29.65–30.93) | 4,686 / 10,250,439 | 52.17 (50.67–53.71) | 34.34 |
| Vermont | 3,512 / 9,393,709 | 32.69 (31.61–33.78) | 1,152 / 2,308,375 | 37.67 (35.50–39.97) | 33.61 |
| Virginia | 47,580 / 116,579,933 | 41.63 (41.25–42.00) | 17,954 / 29,567,724 | 52.69 (51.92–53.48) | 43.68 |
| Washington | 38,073 / 98,931,323 | 38.41 (38.02–38.80) | 13,121 / 26,693,320 | 44.97 (44.20–45.76) | 39.62 |
| West Virginia | 18,198 / 28,023,276 | 54.53 (53.73–55.32) | 5,912 / 6,251,382 | 71.19 (69.35–73.08) | 57.62 |
| Wisconsin | 40,129 / 82,712,057 | 42.24 (41.83–42.66) | 14,983 / 20,324,947 | 59.49 (58.53–60.46) | 45.43 |
| Wyoming | 2,353 / 7,921,067 | 29.18 (27.99–30.37) | 1,047 / 1,969,816 | 44.46 (41.76–47.30) | 32.01 |

AAMR, age-adjusted mortality rate per 100,000 population, standardized to the 2000 U.S. standard population. CI, confidence interval. State-level analyses reported separately for 1999–2020 and 2021–2025 owing to revised reliability and suppression rules in CDC WONDER after 2020. CKD, chronic kidney disease (ICD-10: N18). Data source: CDC WONDER Multiple Cause of Death database.
